# Supplementary material
Source: Springer Nature journal article supplement (https://www.springermedizin.de/resource/supplementary/12913_2011_2601_MOESM3_ESM.doc/9529864)
Supplement: MOESM3 [file 9529864]

**Table 1: Patient characteristics (n=2152)**

|  | **included** (n=1745) | | **not included** (n=407) | | ***p*** |
| --- | --- | --- | --- | --- | --- |
| **Age (years);** mean (SD) | 67.8 | (9.9) | 69.5 | (9.4) | *0.002* |
| **Gender** |  |  |  |  | *0.807* |
| Female % (n) | 31.6 | 552 | 3.9 | 116 |  |
| Male % (n) | 68.4 | 1193 | 69.1 | 260 |  |
| **Education** |  |  |  |  | *0.489* |
| <= 9 years % (n) | 31.3 | (547) | 33.2 | (116) |  |
| > 9 years % (n) | 68.7 | (1198) | 66.8 | (233) |  |
| **Frequency of practice attendance** |  |  |  |  | *0.028* |
| <= 3 times / year % (n) | 34.2 | (596) | 41.5 | (149) |  |
| 4-7 times/ year % (n) | 38.7 | (675) | 33.7 | (121) |  |
| > 7 times / year % (n) | 22.5 | (474) | 24.8 | (89) |  |
| **Duration of being patient in practice** |  |  |  |  | *0.415* |
| up to 2 years % (n) | 3.7 | (64) | 3.8 | (14) |  |
| 3-7 years % (n) | 12.7 | (221) | 1.2 | (38) |  |
| > 7 years % (n) | 83.7 | (1460) | 86.1 | (321) |  |
| **Already been asked for quality assessment** |  |  |  |  | *0.099* |
| No % (n) | 75.5 | (1317) | 78.7 | (266) |  |
| Don’t know % (n) | 9.8 | (171) | 1.9 | (37) |  |
| Yes % (n) | 14.7 | (257) | 1.4 | (35) |  |
| **Number of conditions (O-11);** mean (SD) | 3.3 | (1.7) | 3.0 | (1.8) | *0.000* |

* p values are based on χ2 tests for categorical variables and on t tests for continuous variables
